# Supplementary material
Source: HighWire-hosted journal article supplement (http://www.cfp.ca/highwire/filestream/30384/field_highwire_adjunct_files/0/Rebuttal_No.pdf)
Supplement: Rebuttal_No.pdf [file Rebuttal_No.pdf]

## Rebuttal: Is tight glycemic control in type 2 diabetes really worthwhile?

NO

Galt Wilson MD MSc FCFP Thomas Perry MDCM FRCP(C)

There is limited evidence for modest, clinically debatable, “microvascular” benefits of hemoglobin A<sub>1c</sub> (HbA<sub>1c</sub>) target values higher than “tight” glycemic control. The ACCORD (Action to Control Cardiovascular Risk in Diabetes) trial suggests that a target level of less than 7% is dangerous.<sup>1</sup> Patients must understand these things to make rational, informed choices about their own medical care.

Dr Clement and colleagues warn of negative consequences if ACCORD “headlines” cause physicians to “relax in treating diabetes to target.” They characterize the absolute mortality increase of 1% associated with intensive control in ACCORD<sup>1</sup> as “slight.” However, this 25% relative increase (from 4% to 5%) is of the same relative magnitude but far more important clinically than the “21% or 25% reduction in microvascular complications” they tout from ADVANCE (Action in Diabetes and Vascular Disease: Preterax and Diamicon MR Controlled Evaluation)<sup>2</sup> or UKPDS (UK Prospective Diabetes Study).<sup>3</sup>

They assert that “the trials cited” show that targeting HbA<sub>1c</sub> values to below 7% reduces microvascular complications. But, as acknowledged, these trials include DCCT (Diabetes Control and Complications Trial)<sup>4</sup> and its follow-up, EDIC (Epidemiology of Diabetes Intervention and Complications),<sup>5</sup> which are studies of type 1 diabetes—a profoundly different disease. For type 2 diabetes, almost all of the reduction in adverse microvascular outcomes is accounted for by measures that might be unimportant to most of our patients: reductions in proteinuria, but not renal failure, or in retinal photocoagulation, but not blindness.

Clement et al argue that macrovascular complications “might” be reduced, should tight control be initiated early. This is a weak basis for imposing the corollary burden of financial expense, weight gain, and hypoglycemic episodes on patients. And there is currently no evidence for its prevention of cerebral or peripheral vascular disease.

Recently, 2 additional large trials have suggested that aiming for “tight glycemic control” does more harm

than good in established type 2 diabetes mellitus<sup>6</sup> and in patients in the intensive care unit.<sup>7</sup>

Will “tight control” truly benefit some patients with type 2 diabetes? If so, it will be necessary to treat many individuals to prevent 1 event that matters. Withholding this information or promoting a non-evidence-based “standard of care” erodes patient autonomy, and is therefore unethical.

A recently published article in *Annals of Internal Medicine* summarizes how current knowledge could be applied to help individual patients with type 2 diabetes mellitus:

tight glycemic control burdens patients with complex treatment programs, hypoglycemia, weight gain, and costs and offers uncertain benefits in return. We believe clinicians should prioritize supporting well-being and healthy lifestyles, preventive care, and cardiovascular risk reduction in these patients. Glycemic control efforts should individualize HbA<sub>1c</sub> targets so that those targets and the actions necessary to achieve them reflect patients’ personal and clinical context and their informed values and preferences.<sup>8</sup>

Single-minded pursuit of “tight control” diverts resources from more rewarding investments for health promotion. Physical education; building walking, cycling, and skiing trails, community swimming pools, and gyms; and lifestyle counseling could reduce the prevalence of type 2 diabetes. For older patients facing progressive illness, home support is usually more valuable than a completed glucometer record. 

**Dr Wilson** is a Clinical Professor in the Department of Family Practice at the University of British Columbia in Vancouver and Clinical Clerkship Director of the Northern Medical Program in Prince George, BC. **Dr Perry** is an Assistant Clinical Professor in the Department of Anesthesiology, Pharmacology & Therapeutics and the Department of Medicine, and is a member of the Therapeutics Initiative at the University of British Columbia.

#### Competing interests

None declared

#### Correspondence

Dr G. Wilson, 1230 Alward St, Prince George, BC V2M 7B1; telephone 250 563-3024; fax 250 562-4575; e-mail [galt.wilson@northernhealth.ca](mailto:galt.wilson@northernhealth.ca)

*continued on next page*

No continued from previous page

#### References

1. Action to Control Cardiovascular Risk in Diabetes Study Group; Gerstein HC, Miller ME, Byington RP, Goff DC Jr, Bigger JT, et al. Effects of intensive glucose lowering in type 2 diabetes. *N Engl J Med* 2008;358(24):2545-59. Epub 2008 Jun 6.
2. ADVANCE Collaborative Group; Patel A, MacMahon S, Chalmers J, Neal B, Billot L, et al. Intensive blood glucose control and vascular outcomes in patients with type 2 diabetes. *N Engl J Med* 2008;358(24):2560-72. Epub 2008 Jun 6.
3. UK Prospective Diabetes Study (UKPDS) Group. Intensive blood-glucose control with sulphonylureas or insulin compared with conventional treatment and risk of complications in patients with type 2 diabetes (UKPDS 33). *Lancet* 1998;352(9131):837-53.
4. The Diabetes Control and Complications Trial Research Group. The effect of intensive treatment of diabetes on the development and progression of long-term complications in insulin-dependent diabetes mellitus. *N Engl J Med* 1993;329(14):977-86.
5. Nathan DM, Cleary PA, Backlund JY, Genuth SM, Lachin JM, Orchard TJ, et al. Intensive diabetes treatment and cardiovascular disease in patients with type 1 diabetes. *N Engl J Med* 2005;353(25):2643-53.
6. Duckworth W, Abraira C, Moritz T, Reda D, Emanuele N, Reaven PD, et al. Glucose control and vascular complications in veterans with type 2 diabetes. *N Engl J Med* 2009;60(2):129-39. Epub 2008 Dec 17.
7. NICE-SUGAR Study Investigators; Finfer S, Chittock DR, Su SY, Blair D, Foster D, et al. Intensive versus conventional glucose control in critically ill patients. *N Engl J Med* 2009;360(13):1283-97. Epub 2009 Mar 24.
8. Montori VM, Fernández-Balsells M. Glycemic control in type 2 diabetes: time for an evidence-based about face? *Ann Intern Med* 2009 Apr 20. Epub ahead of print. Available from: [www.annals.org/cgi/content/full/0000605-200906020-00118v1](http://www.annals.org/cgi/content/full/0000605-200906020-00118v1). Accessed 2009 May 12.

— \* \* \* —
